# Supplementary material for: Electrocatalytic oxygen reduction to hydrogen peroxide through a biomass-derived nitrogen and oxygen self-doped porous carbon metal-free catalyst
Source: Royal Society of Chemistry journal article supplement (doi:10.1039/d1ta06955a), 2021-01-01
Supplement: d1ta06955a1.pdf [file d1ta06955a1.pdf]

## Supplementary Information

### **Electrocatalytic oxygen reduction to hydrogen peroxide through a biomass-derived nitrogen and oxygen self-doped porous carbon metal-free catalyst**

Shuaishuai Xin<sup>a, b, d</sup>, Yifan Li<sup>c</sup>, Jing Guan<sup>c</sup>, Bingrui Ma<sup>a, d</sup>, Chunlei Zhang<sup>a</sup>, Xiaoming Ma<sup>a</sup>, Wenjie Liu<sup>a, d</sup>, Yanjun Xin<sup>b\*</sup>, Mengchun Gao<sup>a, d\*</sup>

*<sup>a</sup> Key Lab of Marine Environment and Ecology, Ministry of Education, Ocean University of China, Qingdao 266100, China*

*<sup>b</sup> Qingdao Engineering Research Center for Rural Environment, College of Resources and Environment, Qingdao Agricultural University, Qingdao 266109, China*

*<sup>c</sup> School of Environmental and Municipal Engineering, Qingdao University of Technology, Qingdao 266033, China*

*<sup>d</sup> Shandong Provincial Key Laboratory of Marine Environment and Geological Engineering, Ocean University of China, Qingdao 266100, China*

**\*Corresponding author.**

E-mail: [xintom2000@126.com](mailto:xintom2000@126.com); (Yanjun Xin)

E-mail: [mengchungao@outlook.com](mailto:mengchungao@outlook.com) (Mengchun Gao)

### Test 1 The Koutecky-Levich equation

$$\frac{1}{I} = \frac{1}{nFkC_{O_2}} + \frac{1}{0.62nF(D_{O_2})^{2/3}v^{-1/6}C_{O_2}\omega^{1/2}}$$

(1)

Where  $I$  is the density,  $n$  is the number of transferred electrons,  $F$  is the Faraday constant,  $k$  presents the constant of electron transfer rate,  $v$  is the kinematic viscosity of the electrolyte,  $\omega$  is the rotation speed,  $D_{O_2}$  and  $C_{O_2}$  are the diffusivity and solubility of  $O_2$ , respectively.

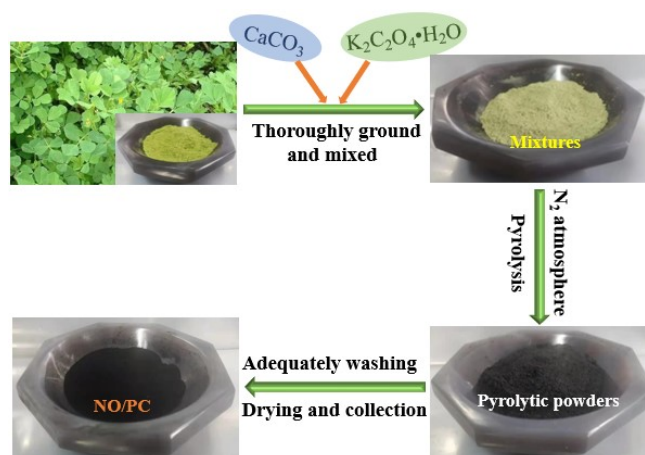

**Fig. S1.** The preparation procedures of the alfalfa-derived NO/PCs.

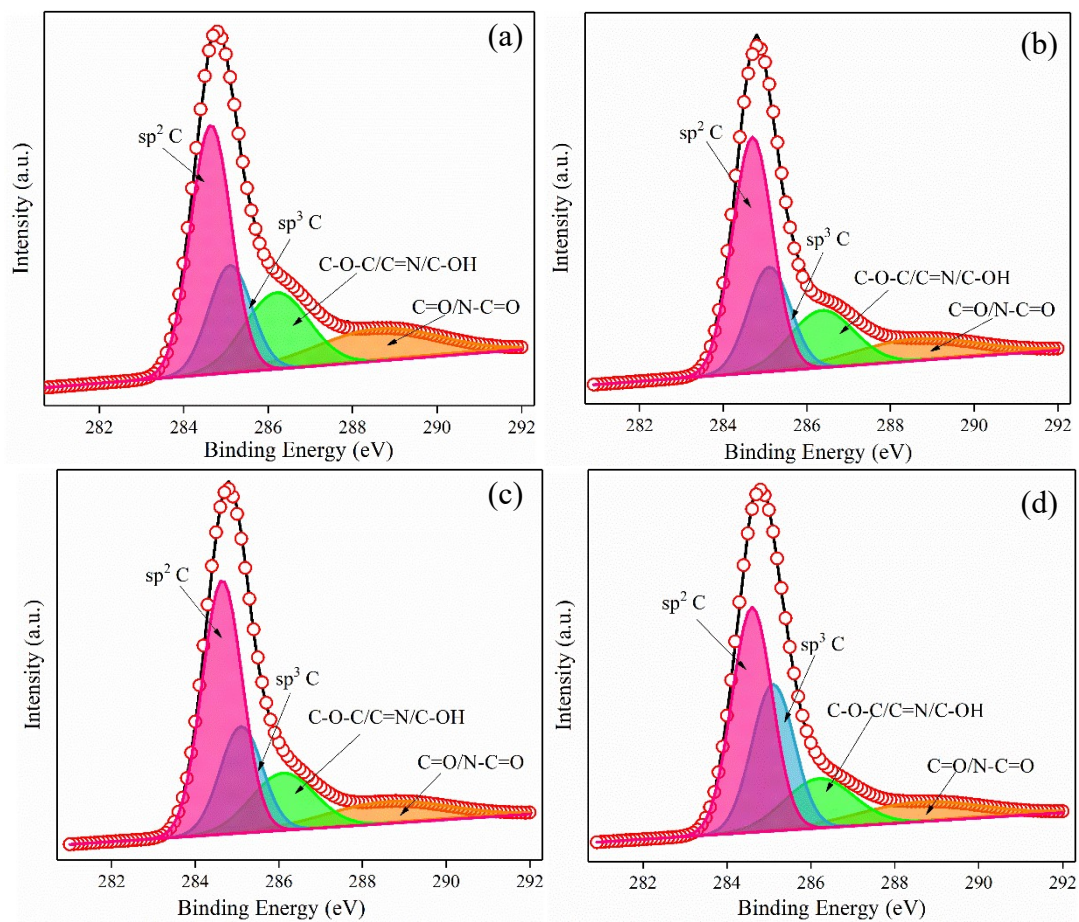

**Fig. S2.** The C 1s spectra of NO/PC-450 (a), NO/PC-500 (b), NO/PC-600 (c) and NO/PC-700 (d) recorded by high resolution XPS characterization.

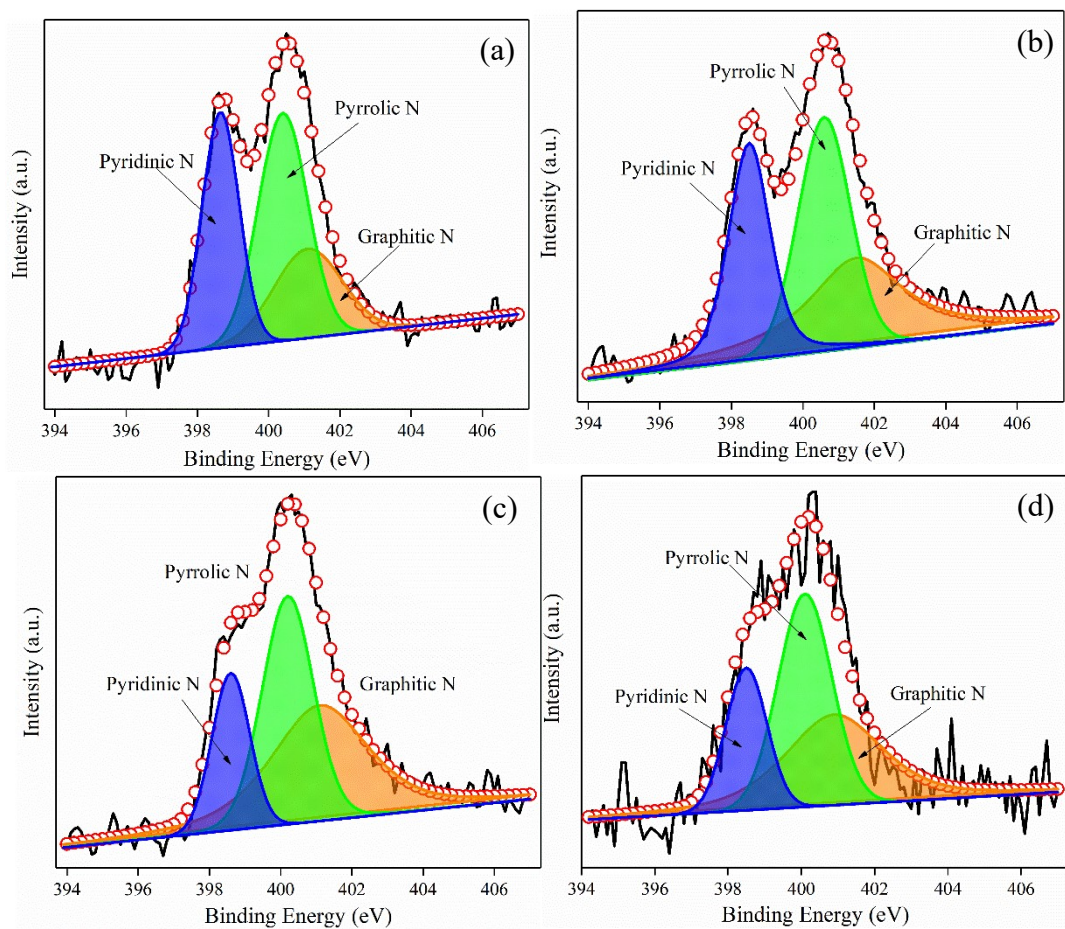

**Fig. S3.** The N 1s spectra of NO/PC-450 (a), NO/PC-500 (b), NO/PC-600 (c) and NO/PC-700 (d) recorded by high resolution XPS characterization.

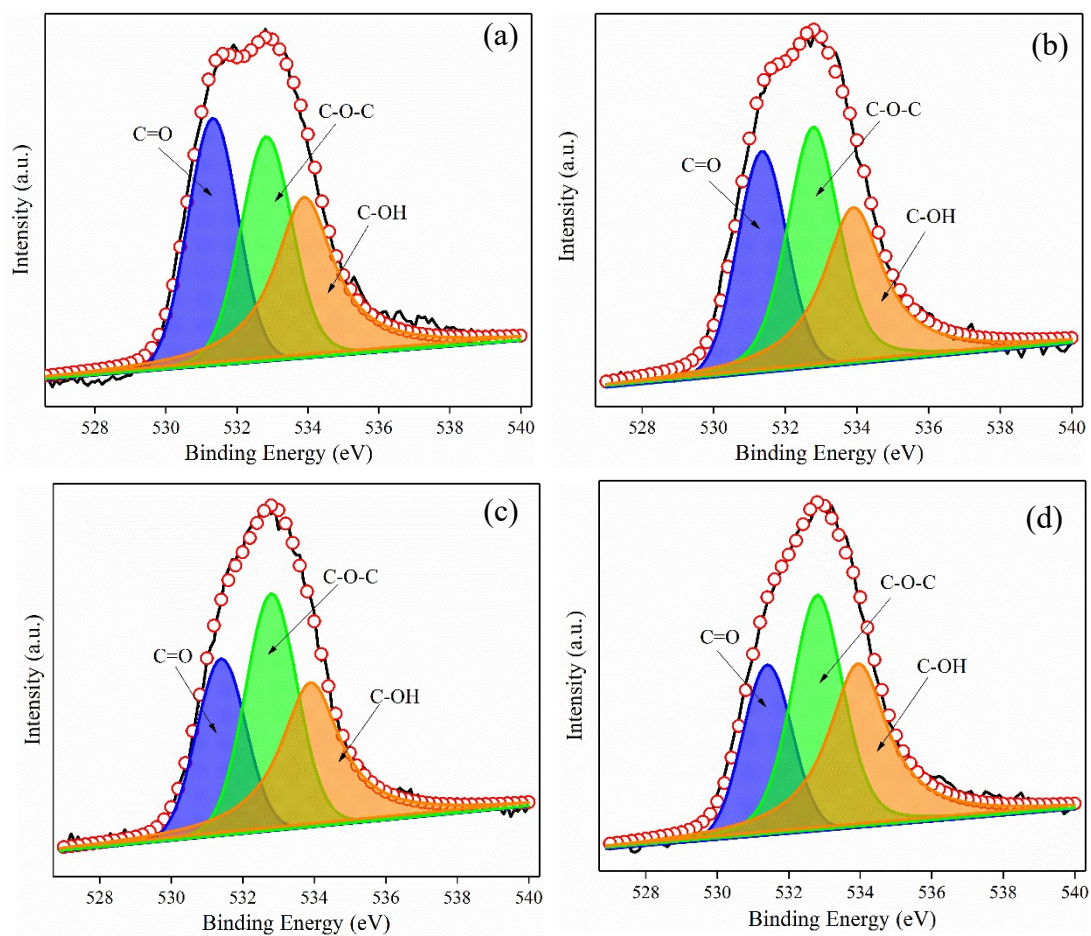

**Fig. S4.** The O 1s spectra of NO/PC-450 (a), NO/PC-500 (b), NO/PC-600 (c) and NO/PC-700 (d) recorded by high resolution XPS characterization.

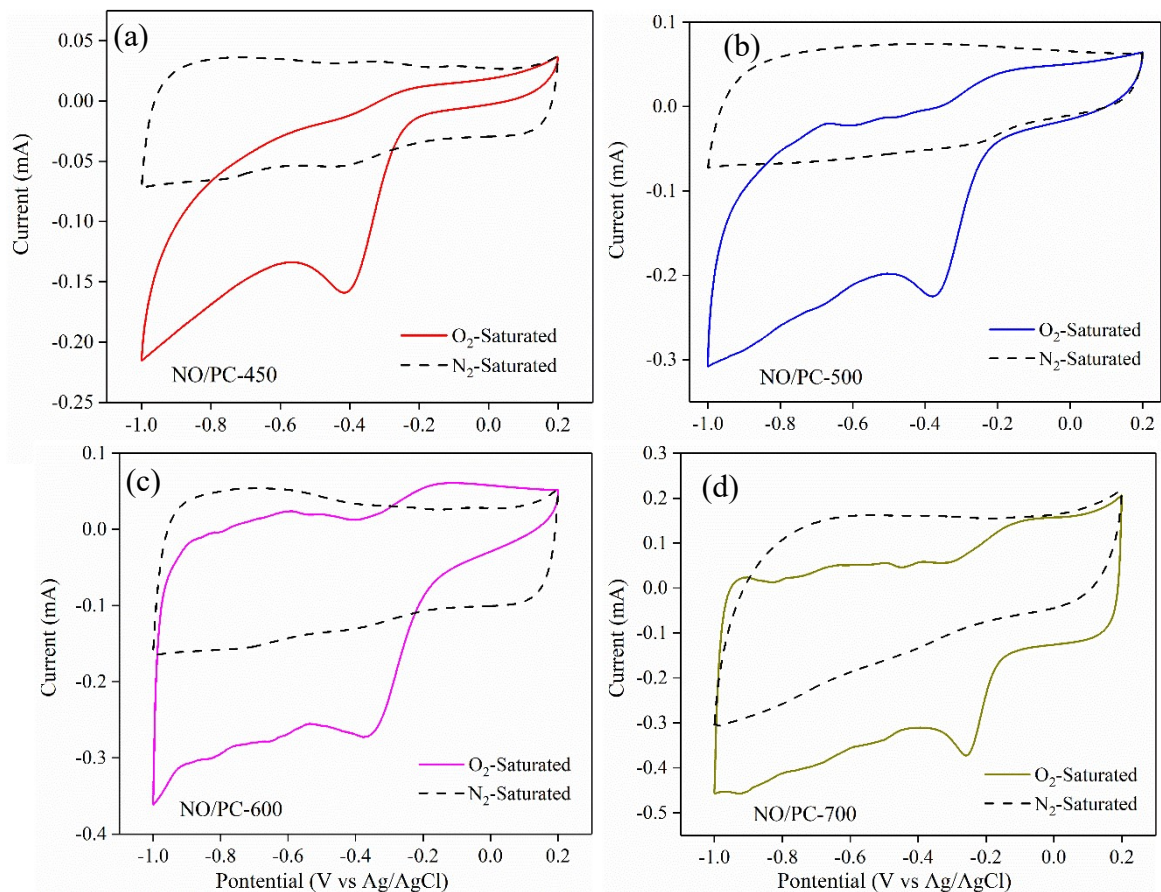

**Fig. S5.** The CV curves with scan rates of  $50 \text{ mV s}^{-1}$  of various NO/PCs in  $\text{O}_2$ -saturated and  $\text{N}_2$ -saturated solution.

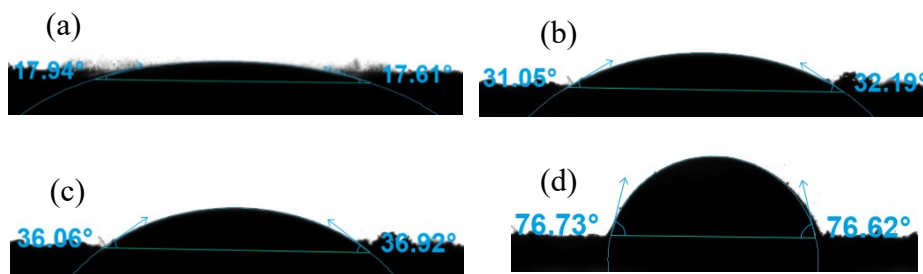

**Fig. S6.** The contact angle of NO/PC-450 (a), NO/PC-500 (b), NO/PC-600 (c) and NO/PC-700 (d) with water.

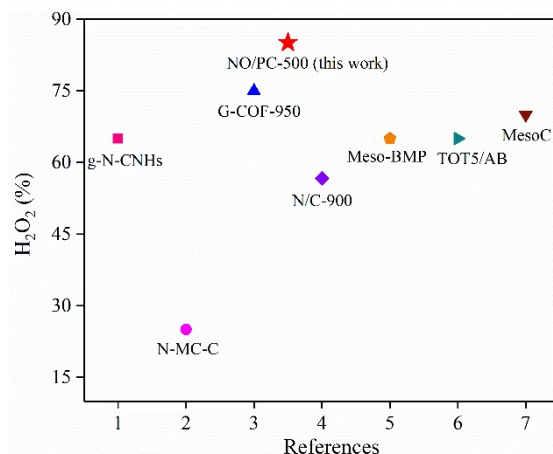

**Fig. S7.** Comparison of the two-electron ORR selectivity for H<sub>2</sub>O<sub>2</sub> generation of NO/PC-500 with other metal-free carbon materials.

## References

1. D. Iglesias, A. Giuliani, M. Melchionna, S. Marchesan and A. Criado, *Cur. For. Rep.* 2018, **4**, 106-123.
2. G. Daniel, Y. Zhang, S. Lanzalaco, F. Brombin and C. Durante, *ACS Sustain. Chem. Eng.* 2020, **38**, 14425-14440.
3. J. Zhang, G. Zhang, S. Jin, Y. Zhou and J. Qu, *Carbon* 2020, **163**, 154-161
4. Y. Yang, F. He, Y. Shen, X. Chen, H. Mei, S. Liu and Y. Zhang, *Chem. Commun.* 2017, **53**, 9994-9997.
5. F. Hasché, M. Oezaslan, P. Strasser and T. P. Fellingner, *J. Energ. Chem.* 2016, **25** (2), 251-257.
6. T. Murata, K. Kotsuki, H. Murayama, R. Tsuji and Y. Morita, *Commun. Chem.* 2019, **2**, 46.
7. S. Chen, Z. Chen, S. Siahrostami, T. R. Kim, D. Nordlund, D. Sokaras, S. Nowak, J. W. F. To, D. Higgins, R. Sinclair, J. K. Nørskov, T. F. Jaramillo and Z. Bao, *ACS Sustain. Chem. Eng.* 2018, **6**, 311-317.

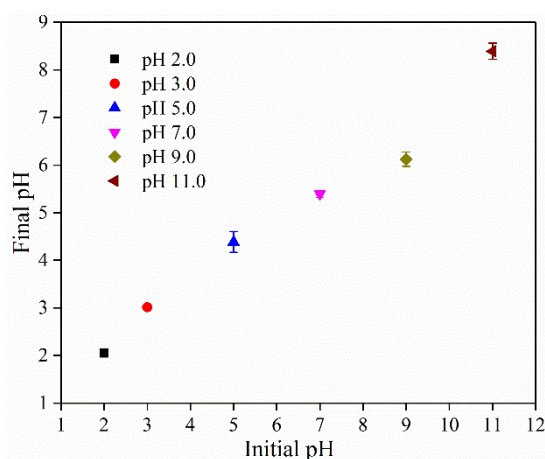

**Fig. S8.** The final solution pH in various initial pH after 240 min electrolysis.

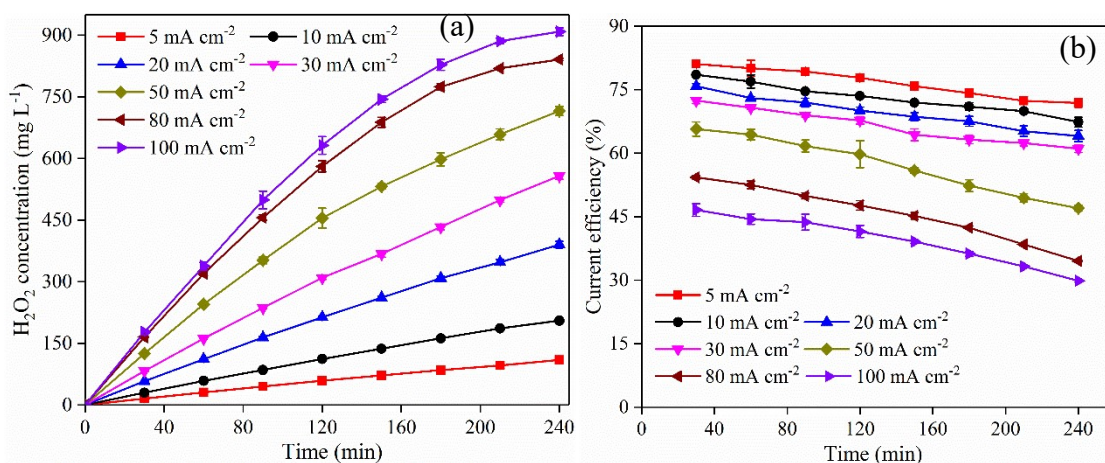

**Fig. S9.** Influence of current density on H<sub>2</sub>O<sub>2</sub> concentration (a) and current efficiency (b) for NO/PC-500-GDE. (NO/PC-500 to PTFE binder ratio of 1:3 and pH 3.0)

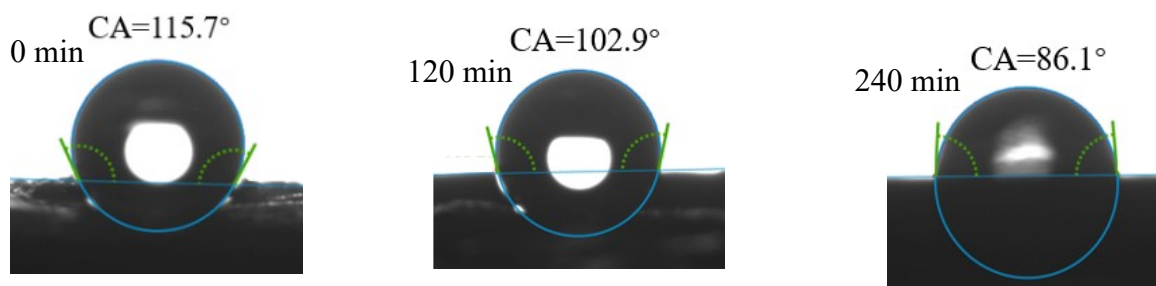

**Fig. S10.** The contact angle of NO/PC-500-GDE without hydrophobic layer as a function of electrolysis time at 30 mA cm<sup>-2</sup>.

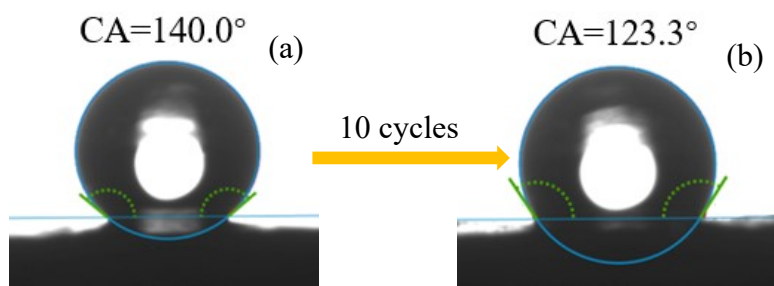

**Fig. S11.** The contact angle of NO/PC-500-GDE (a) and NO/PC-500-GDE after 10 cycles at 100 mA cm<sup>-2</sup> (b).



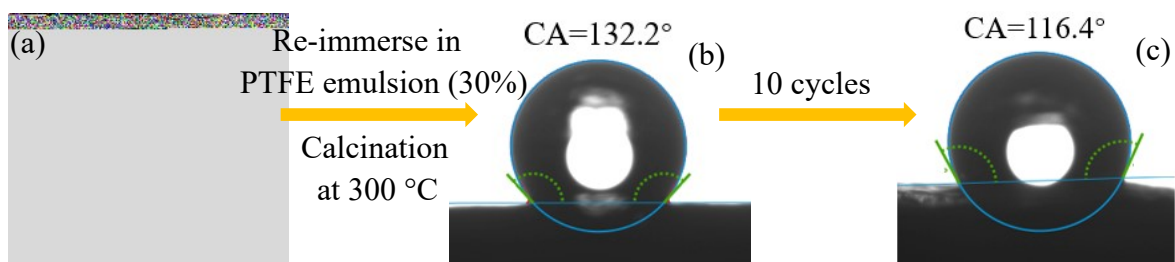

**Fig. S12.** The contact angle of deactivated cathode (a), the restored cathode (b) and the restored cathode after 10 times consecutive experiments at 100 mA cm<sup>-2</sup> (c).

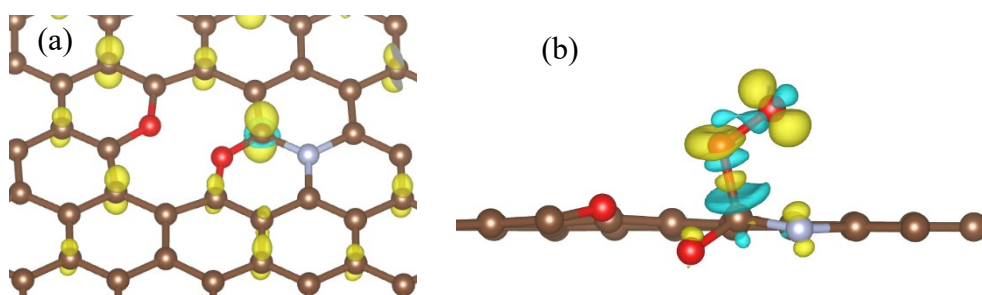

**Fig. S13.** The extra electron distribution of catalyst surface (a) and the difference electron density of O<sub>2</sub> adsorbed on the catalyst surface (b). (Yellow and Blue are the electron enrichment region and the charge enrichment region, respectively)

**Table S1** BET surface area and pore structure properties of the N-O/PC samples.

| Samples   | BET surface area (m <sup>2</sup> g <sup>-1</sup> ) | Pore volume (cm <sup>3</sup> g <sup>-1</sup> ) |
|-----------|----------------------------------------------------|------------------------------------------------|
| NO/PC-450 | 99.6                                               | 0.1                                            |
| NO/PC-500 | 581.8                                              | 0.3                                            |
| NO/PC-600 | 1125.8                                             | 0.5                                            |
| NO/PC-700 | 1860.3                                             | 1.3                                            |

**Table S2** Optimized DFT models for adsorption OOH and H<sub>2</sub>O<sub>2</sub> on various types of N/O containing functional groups doping and pure carbon substrate.

| Substrates         | Substrates models                                                                   | OOH adsorbed substrates models                                                       | H <sub>2</sub> O <sub>2</sub> adsorbed substrates models                              |
|--------------------|-------------------------------------------------------------------------------------|--------------------------------------------------------------------------------------|---------------------------------------------------------------------------------------|
| Pure carbon        | 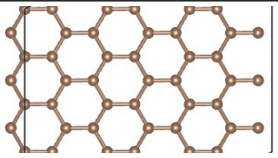   |    |    |
| C-Gr-N             |    |    |    |
| C-Gr-N-C-O-C       |    |    |    |
| C-Gr-N(Pyri-N)-C=O |   |   |   |
| C-Pyri-N           |  |  |  |
| C-Pyri-N-C-O-C     |  |  |  |
| C-Pyrr-N           |  |  |  |
| C-Pyrr-N-C-O-C     |  |  |  |
| C-Pyrr-N-C=O       |  |  |  |

**Table S3** Total energy of the clear substrates surface and OOH molecule adsorbed substrates, and adsorption energy of OOH molecule on various substrates

| Substrates         | Total energy of the clear substrates surface (eV) | Total energy of OOH molecule adsorbed substrates (eV) | Adsorption energy (eV) |
|--------------------|---------------------------------------------------|-------------------------------------------------------|------------------------|
| Pure carbon        | -660.09                                           | -673.20                                               | -0.35                  |
| C-Gr-N             | -658.67                                           | -672.50                                               | -1.07                  |
| C-Gr-N-C-O-C       | -650.45                                           | -665.36                                               | -2.15                  |
| C-Gr-N(Pyri-N)-C=O | -674.07                                           | -687.45                                               | -0.62                  |
| C-Pyri-N           | -654.89                                           | -668.59                                               | -0.94                  |
| C-Pyri-N-C-O-C     | -645.85                                           | -658.87                                               | -0.26                  |
| C-Pyrr-N           | -652.41                                           | -665.78                                               | -0.61                  |
| C-Pyrr-N-C-O-C     | -645.15                                           | -659.55                                               | -1.64                  |
| C-Pyrr-N-C=O       | -672.43                                           | -685.73                                               | -0.54                  |

The free energy of isolated OOH molecule is -12.76 eV

**Table S4** Total energy of the clear substrates surface and OOH molecule adsorbed substrates, and adsorption energy of H<sub>2</sub>O<sub>2</sub> molecule on various substrates.

| Substrates          | Total energy of the clear substrates surface (eV) | Total energy of H <sub>2</sub> O <sub>2</sub> molecule adsorbed substrates (eV) | Adsorption energy (eV) |
|---------------------|---------------------------------------------------|---------------------------------------------------------------------------------|------------------------|
| Pure carbon         | -660.09                                           | -678.26                                                                         | -0.03                  |
| C-Gr-N              | -658.67                                           | -676.87                                                                         | -0.06                  |
| C-Gr-N-C-O-C        | -650.45                                           | -668.94                                                                         | -0.35                  |
| C- Gr-N(Pyri-N)-C=O | -674.07                                           | -692.50                                                                         | -0.29                  |
| C-Pyri-N            | -654.89                                           | -673.45                                                                         | -0.42                  |
| C-Pyri-N-C-O-C      | -645.85                                           | -665.06                                                                         | -1.07                  |
| C-Pyrr-N            | -652.41                                           | -670.75                                                                         | -0.2                   |
| C-Pyrr-N-C-O-C      | -645.15                                           | -663.86                                                                         | -0.57                  |
| C-Pyrr-N-C=O        | -672.43                                           | -690.90                                                                         | -0.33                  |

The free energy of isolated H<sub>2</sub>O<sub>2</sub> molecule is -18.14 eV.
